# Supplementary material for: MiT/TFE factors control ER‐phagy via transcriptional regulation of FAM134B
Source: PubMed Central journal article supplement (PMC7459426; doi:10.15252/embj.2020105696), 2020-07-27

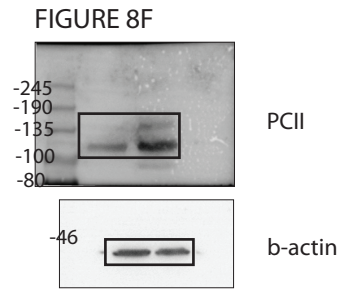

Supplement: EMBJ-39-e105696-s016.pdf [file EMBJ-39-e105696-s016.pdf]
