# Supplementary material for: MiT/TFE factors control ER‐phagy via transcriptional regulation of FAM134B
Source: EMBO J. 2020 Jul 27;39(17):e105696. doi: 10.15252/embj.2020105696 (PMC7459426; doi:10.15252/embj.2020105696)
Supplement: Supplementary file 1 — Expanded View Figures PDF [file EMBJ-39-e105696-s001.pdf]

## Expanded View Figures

### Figure EV1. FGF signaling modulates lysosome biogenesis and function.

- A FACS analysis of LysoTracker dye fluorescence in RCS chondrocytes treated with FGF ligands for 4 h (50 ng/ml). Fluorescence intensities were expressed as % relative to vehicle (5% ABS). Mean  $\pm$  standard error of the mean (SEM) of  $N = 3$  biological replicates/treatment.
- B FACS analysis of DQ-BSA dye fluorescence in RCS chondrocytes treated with the indicated FGF ligands (50 ng/ml; 4 h). Fluorescence intensities were expressed as % relative to vehicle (5% ABS). Concanamycin A (100 nM; 1 h) was used to inhibit lysosomal degradation. Mean  $\pm$  standard error of the mean (SEM) of  $N = 3$  biological replicates.
- C Immunofluorescence staining of Lamp1 (red) in RCS chondrocytes treated with vehicle (5% ABS) and FGF18 (50 ng/ml) for 4 h. Nuclei were stained with DAPI (blue). Scale bar 10  $\mu$ m. Representative images of three independent experiments.
- D Enzymatic assay of lysosomal  $\beta$ -glucuronidase and  $\beta$ -hexosaminidase enzymes in chondrocytes with indicated genotypes (ctrl = wild type) treated with FGF18 (50 ng/ml) for 16 h. Mean  $\pm$  standard error of the mean (SEM)  $N = 5$  biological replicates (Gusb) and  $N = 6$  biological replicates (Hexb). One-way analysis of variance (ANOVA)  $P < 0.001$ ; Tukey's post hoc test \*\*\* $P < 0.0005$ ; \*\* $P < 0.05$ ; \* $P < 0.05$ ; NS, not significant. Blank represents the value of the substrate alone.
- E Western blot analysis of wild type (ctrl) and ATG9A<sup>KO</sup> RCS, showing the absence of ATG9A protein and SQSTM1/p62 accumulation in the KO compared to ctrl. Representative images of  $N = 3$  biological replicates.  $\beta$ -actin was used as a loading control.
- F Co-immunofluorescence staining of ER (ER-Tracker BODIPY Green) and lysosomes (Lamp1, red) in ATG9A<sup>KO</sup> chondrocytes treated with 5% ABS (vehicle) or FGF18 (50 ng/ml) for 16 h. Representative images of  $N = 3$  biological replicates. Scale bar 10  $\mu$ m.
- G Western blot analysis of FGFR<sup>KO</sup> clones (ctrl = wild type) showing the absence of indicated FGFR proteins.  $\beta$ -actin was used as a loading control. Asterisks indicate non-specific bands.
- H FACS analysis of LysoTracker dye fluorescence in RCS with indicated genotypes (ctrl = wild type) treated with FGF18 (50 ng/ml) for 16 h. Fluorescence intensities were expressed as % relative to vehicle (5% ABS). Mean  $\pm$  standard error of the mean (SEM) of  $N = 3$  (FGFR3<sup>KO</sup>, FGFR4<sup>KO</sup>, FGFR1<sup>KO</sup>, FGFR3;1<sup>KO</sup>, FGFR3;4<sup>KO</sup>)  $N = 8$  (FGFR2<sup>KO</sup>)  $N = 6$  (FGFR1;2<sup>KO</sup>) biological replicates/treatment/genotype. Analysis of variance (ANOVA)  $P = 4.51 \times 10^{-5}$ ; Tukey's post hoc test \*\*\* $P < 0.0005$ ; \*\* $P < 0.005$ ; \* $P < 0.05$ ; NS, not significant.
- I Representative immunofluorescence staining of Lamp1 (red) in chondrocytes with indicated genotypes. Higher magnification insets showed enlarged lysosomes in FGFR3/4<sup>KO</sup> chondrocytes. Nuclei were stained with DAPI (blue). Scale bar 15 and 5  $\mu$ m (higher magnification boxes). Representative images of  $N = 3$  biological replicates/treatment.
- J Representative TEM images of wild type (ctrl) and FGFR3;4<sup>KO</sup> chondrocytes showing lysosomes (arrows); scale bar 500 nm. Insets show enlargement of lysosomes; scale bar 250 nm. Quantification of organelle diameter (nm). Mean  $\pm$  standard error of the mean (SEM) of  $N = 3$  biological replicates/genotype. Student's unpaired  $t$ -test \*\*\* $P < 0.0005$ ; NS, not significant.  $n = 45$  (ctr) and  $n = 51$  (FGFR3;4<sup>KO</sup>) cells were analyzed. Lys = lysosome; EE = endosome.

Source data are available online for this figure.

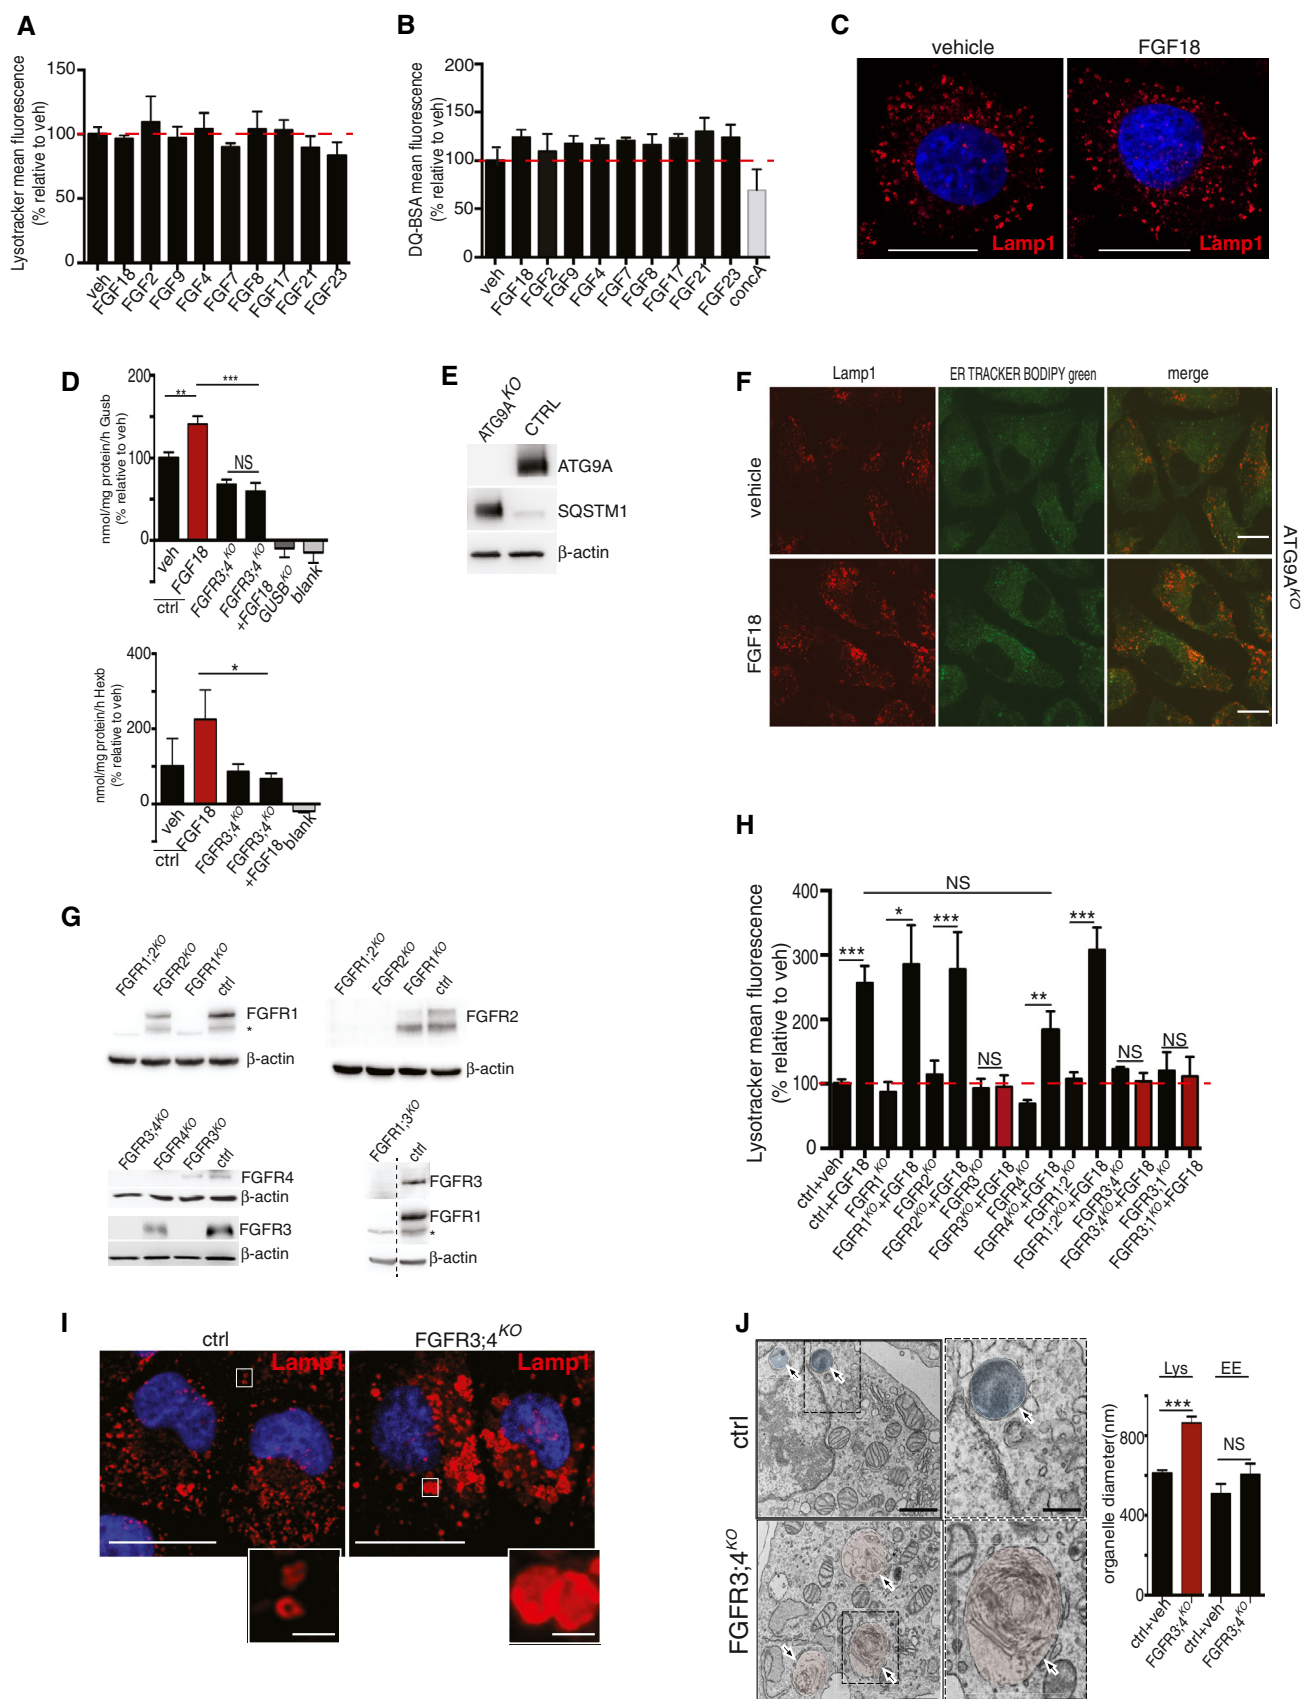

Figure EV1.

**Figure EV2. FGF-dependent regulation of IRS1-PI3K signaling and of TFEB and TFE3 activity.**

- A Western blot analysis of p-P70S6K (T389), P70S6K, p-4EBP1(S65), 4EBP1, p-S6 ribosomal protein (S240/S242), S6 ribosomal protein, p-AKT (S473), AKT proteins in RCS chondrocytes treated as indicated (FGF18: 50 ng/ml 16 h; Torin 1: 1  $\mu$ M for 2 h; amino acid starvation (AA-) for 50 min; amino acid re-feeding (AA) : 3 $\times$  for 20 min). Representative images of  $N = 3$  biological replicates.  $\beta$ -actin was used as a loading control.
- B Western blot analysis of IRS1 and phospho-IRS1 (S307) in chondrocytes treated with vehicle (5%ABS), FGF18 (50 ng/ml), and JNK inhibitor (50  $\mu$ M) for indicated time. Filamin A was used as a loading control. Blot is representative of  $N = 3$  independent experiments.
- C KEGG pathway analysis of Quantsec gene expression analysis in RCS chondrocytes treated with vehicle (5% ABS) and FGF18 (50 ng/ml) overnight, showing upregulated (red) and downregulated (green) biological processes and cellular components.
- D Schematic diagram showing qPCR primers used to analyze Fam134b isoform expressions. Arrows indicate the positions qPCR primer pairs used to detect Fam134b-1 (black arrows), Fam134b-2 (brown arrows), or both (turquoise arrows) Fam134b isoforms. Primer sequences are listed in *Materials and Methods*.
- E TFEB (green) subcellular localization analysis in wild type (control) and FGFR3;4<sup>KO</sup> chondrocytes treated with FGF18 (50 ng/ml) for 16 h. Torin 1 was used at 1  $\mu$ M for 2 h as positive control of TFEB nuclear translocation. Nuclei were stained with DAPI (blue). Scale bar 15  $\mu$ m. Quantification is shown in Fig 3A.
- F Chromatin immunoprecipitation experiment in TFEB-WT overexpressing cells treated with FGF18 (50 ng/ml) for 16 h, showing enrichment of TFEB binding on Mucolipin-1 promoter upon FGF18 treatment.  $N = 3$  biological replicates. Mean  $\pm$  standard error (sd). Student's unpaired  $t$ -test  $^{**}P < 0.005$ .
- G Western blot analysis of wild type (ctrl) and TFEB;3<sup>KO</sup> clones, showing the absence of TFEB and TFE3 proteins.  $\beta$ -tubulin was used as a loading control. Asterisk indicates non-specific band.
- H FACS analysis of DQ-BSA dye fluorescence in RCS with indicated genotypes (ctrl = wild type) treated with FGF18 (50 ng/ml for 16 h). Fluorescence intensities were calculated as % relative to vehicle (5% ABS). Mean  $\pm$  standard error of the mean (SEM) of  $N = 4$  biological replicates. One-way analysis of variance (ANOVA)  $P = 0.024$ ; Tukey's post hoc test  $^{*}P < 0.05$ ; NS, not significant.
- I qRT-PCR analysis of lysosomal genes in wild type (ctrl) and TFEB;3<sup>KO</sup> RCS treated with FGF18 (50 ng/ml for 16 h). Fold change values were relative to vehicle and normalized to *Cyclophilin* gene. Mean  $\pm$  standard error of the mean (SEM) of  $N = 4$  biological replicates. Analysis of variance (ANOVA) CTSA  $P = 0.0003$ ; CTSD  $P = 0.0065$ ; Lamp1  $P = 0.00002$ ; Tukey's post hoc test  $^{**}P < 0.005$ ;  $^{*}P < 0.05$ .
- J qRT-PCR analysis of lysosome genes expression in chondrocytes with indicated genotypes (ctrl = wild type). TFEB-S142A:S211A and TFE3-S246A:S312A mutant plasmids were overexpressed for 48 h; FGF18 (50 ng/ml) treatment was for 16 h. Values were normalized to *Cyclophilin* gene and expressed as fold change relative to cells transfected with empty vector (mock). Mean  $\pm$  standard error of the mean (SEM) of  $N = 3$  biological replicates. One-way analysis of variance (ANOVA) Tukey's post hoc test  $^{**}P < 0.005$ .
- K Immunofluorescence staining of Lamp1 (red) in RCS overexpressing TFE3-S246A:S312A-GFP and TFEB-S142A:S211A-GFP (green) with indicated genotype. Insets show lysosomes. TFEB and TFE3 expressing cells have smaller and less vacuolized lysosomes. Nuclei were stained with DAPI (blue). Scale bar 10 and 2  $\mu$ m (higher magnification boxes). Representative images of  $N = 3$  biological replicates.

Source data are available online for this figure.

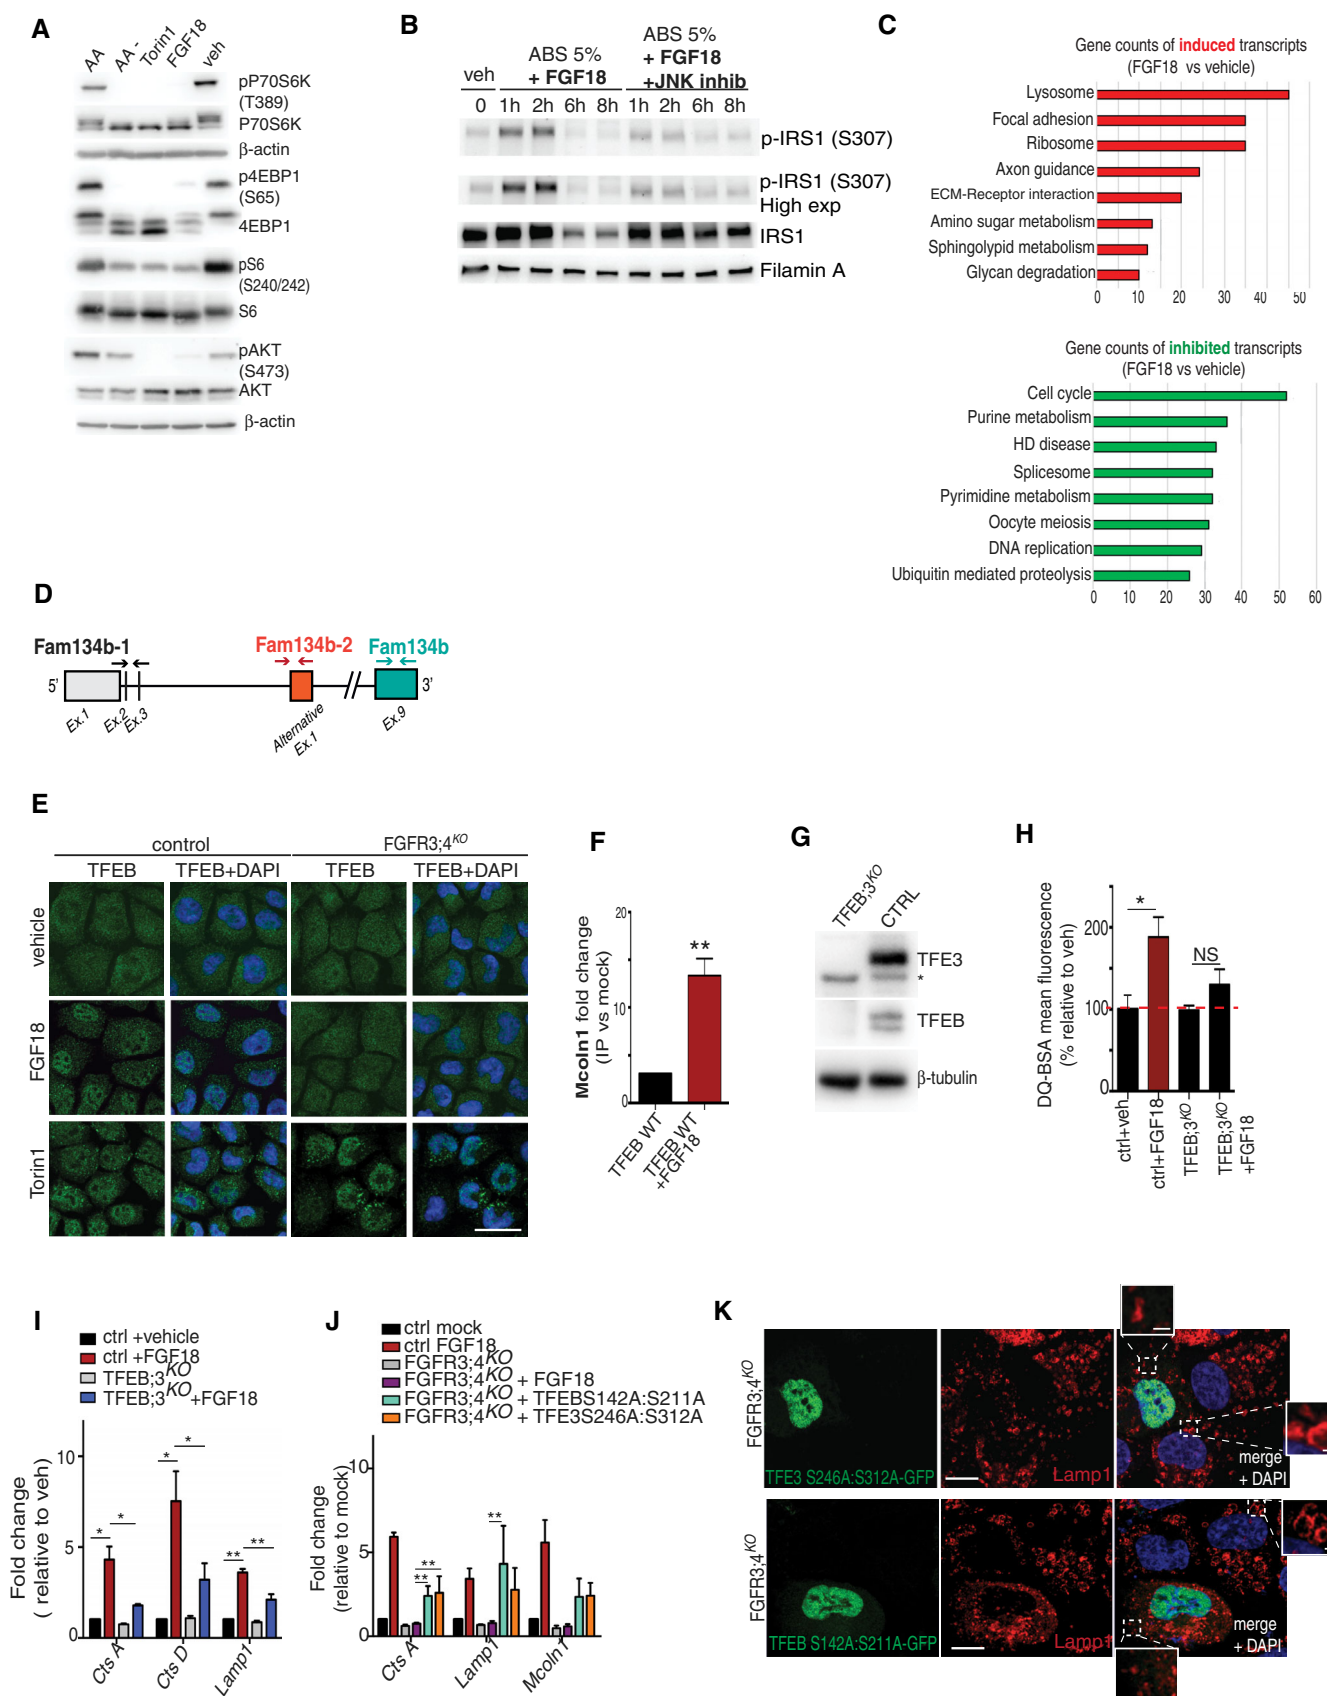

Figure EV2.

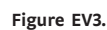

**Figure EV3. FGF18 induces Fam134b expression and ER-phagy.**

- A Representative immunofluorescence staining of TFE3 (red) in RAGA/C-CA-GFP (green) overexpressing RCS treated with FGF18 (50 ng/ml overnight) and Torin 1 (1  $\mu$ M for 2 h). RAGA/C-CA-GFP overexpressing cells (asterisks) retain TFE3 in the cytoplasm in FGF18 (empty nuclei were highlighted by dashed white lines), but not in Torin 1 treatment. Nuclei were stained with DAPI (blue). Scale bar 10  $\mu$ m.
- B Representative images of immunofluorescence staining of LC3 protein in wild type (ctrl) and TFEB;3<sup>KO</sup> RCS treated with vehicle (5% ABS) and FGF18 (50 ng/ml) for 16 h. Scale bar 10  $\mu$ m. Quantification of LC3-positive dots/cell. FGF18 was used at 50 ng/ml for 16 h.  $N = 17$  cells/genotypes were analyzed. Student's paired *t*-test \*\*\* $P < 0.005$ .
- C Western blot analysis of LC3B in wild type (ctrl) and TFEB;3<sup>KO</sup> RCS chondrocytes treated with vehicle (5% ABS) and FGF18 (50 ng/ml) for 12 h. BafA1 (200 nM; 4 h) was used to inhibit lysosome activity.  $\beta$ -actin was used as a loading control. Blots are representative of  $N = 4$  independent experiments. Bar graph shows quantification of LC3II normalized to  $\beta$ -actin. Mean  $\pm$  standard error of the mean (SEM).
- D Representative immunofluorescence staining of mCherry-GFP-LC3 tandem experiment assay in wild type (ctrl) and TFEB;3<sup>KO</sup> RCS treated with vehicle (5% ABS) and FGF18 (50 ng/ml) for 12 h. Nuclei were stained with DAPI (blue).
- E qRT-PCR analysis of *Fam134b* gene expression in RCS transfected with indicated transcription factors for 48 h. FGF18 (50 ng/ml; 16 h) was added where indicated. Values were normalized to *Cyclophilin* gene and expressed as fold change relative to mock-transfected cells. Mean  $\pm$  standard error of the mean (SEM) of  $N = 4$  biological replicates/treatment. Student's paired *t*-test \* $P < 0.05$  and one-way analysis of variance (ANOVA)  $P = 0.0001$ ; Tukey's post hoc test \*\*\* $P < 0.0005$ ; \*\* $P < 0.005$ ; NS, not significant.
- F Western blot analysis of FAM134B and TFEB proteins in RCS overexpressing TFEB-WT and TFEB-S142A:S211 plasmids for 48 h. FGF18 was used at 50 ng/ml for 16 h.  $\beta$ -actin was used as a loading control. Representative images of  $N = 3$  biological replicates. Bar graph shows quantification of Fam134b normalized to  $\beta$ -actin. Mean  $\pm$  standard error of the mean (SEM). Student's paired *t*-test \*\*\* $P < 0.0005$ .
- G Schematic representation of *Fam134b* DNA locus. Arrows indicate the positions qPCR primer pairs used to detect *Fam134b*-1 (black arrows), *Fam134b*-2 (brown arrows), or both (turquoise arrows) isoforms. qRT-PCR of *Fam134b*-1 and *Fam134b*-2 isoforms in RCS with indicated genotypes (veh and FGF18 refer to treated wild-type chondrocytes). FGF18 (50 ng/ml; 16 h) was added where indicated. Values were normalized to *Cyclophilin* gene and expressed as relative to mock-transfected cells. Mean  $\pm$  standard error of the mean (SEM) of  $N = 4$  (*Fam134b*-1) and  $N = 5$  (*Fam134b*-2) biological replicates/treatment. One-way analysis of variance (ANOVA)  $P = 0.0013$ ; Sidak's multiple comparison test \*\*\* $P < 0.0005$ ; \* $P < 0.05$ .
- H, I Immunofluorescence staining of CLIMP63 (light blue) and lysosomes (GFP-Lamp1, red) in FAM134b $\Delta$ LIR RCS chondrocytes transfected with *Fam134b*-1 (H) and *Fam134b*-2 (I) HA-tagged (green) plasmids upon FGF18 treatment (50 ng/ml for 16 h). BafA1 (100 nM; 4 h) was used to inhibit lysosomal degradation. Insets show magnification of CLIMP63 accumulation into lysosomes. Scale bar 10 and 2  $\mu$ m (higher magnification boxes).

Source data are available online for this figure.

**Figure EV4. Starvation induces ER-phagy in RCS and HeLa cells through TFEB and TFE3.**

- A Western blot analysis of phospho-P70S6K (T389), P70S6K, and phospho-TFEB (S142) in RCS cultured in complete medium or HBSS for 16 h.  $\beta$ -actin was used as a loading control. Bar graph shows quantification of phospho-TFEB (S142) normalized to  $\beta$ -actin. Mean  $\pm$  standard error of the mean (SEM) of  $N = 3$  biological replicates. Student's paired *t*-test \* $P < 0.05$ .
- B Subcellular localization analysis of TFE3 (green) in RCS chondrocytes starved with HBSS for 8 h. Torin 1 was used at 1  $\mu$ M for 2 h as positive control. Nuclei were stained with DAPI (blue). Quantification analysis showed % of cells with nuclear TFE3 and TFE3 in RCS with indicated treatments. Mean  $\pm$  standard error of the mean (SEM) of  $N = 3$  biological replicates/treatment. Scale bar 10  $\mu$ m.  $n = 62$  cells (control), 83 cells (HBSS), 47 cells (Torin 1). One-way analysis of variance (ANOVA)  $P < 0.0001$ ; Sidak's multiple comparison test \*\*\* $P < 0.0005$ .
- C qRT-PCR analysis of *Fam134b* isoforms in wild type (ctrl) and TFEB;3<sup>KO</sup> RCS. Cells were starved overnight with HBSS where indicated. Values were normalized to *Cyclophilin* gene and expressed as fold change relative to control (complete medium). Mean  $\pm$  standard error of the mean (SEM) of  $N = 3$  biological replicates. One-way analysis of variance (ANOVA)  $P < 0.0001$ ; Sidak's multiple comparison test \*\*\* $P < 0.0005$ ; NS, not significant.
- D EATR assay in chondrocytes with indicated genotypes (ctrl = wild type) showing % of cells with acidified ER measured by FACS analysis. HBSS starvation was for 16 h. Mean  $\pm$  standard error of the mean (SEM) of  $N = 3$  biological replicates/treatment/genotype. One-way analysis of variance (ANOVA)  $P < 0.0001$ ; Sidak's multiple comparison test \*\*\* $P < 0.0005$ ; \* $P < 0.05$ .
- E Co-staining of CLIMP63 (green) and TMEM192-HA (lysosomes, red) in chondrocytes with indicated genotypes (ctrl = wild type) and starved with HBSS for 16 h where indicated. BafA1 was used at 100 nM for 4 h. Scale bar 10 and 2  $\mu$ m (higher magnification boxes). Bar graph shows quantification of relative CLIMP63 fluorescence in TMEM192-HA decorated lysosomes. Mean  $\pm$  standard error of the mean (SEM) of  $N = 3$  biological replicates.  $N = 10$  cells/experiment were analyzed. One-way analysis of variance (ANOVA)  $P < 0.0001$ ; Sidak's multiple comparison test \*\*\* $P < 0.0005$ .
- F Co-staining of CLIMP63 (green) and TMEM192-HA (lysosomes, red) in wild type (ctrl) and TFEB;3<sup>KO</sup> HeLa cells with indicated genotypes (ctrl = wild type) and starved with HBSS for 16 h where indicated. BafA1 was used at 100 nM for 4 h. Scale bar 15 and 2  $\mu$ m (higher magnification boxes). Quantification showed CLIMP63 relative fluorescence in TMEM192-HA decorated lysosomes. Mean  $\pm$  standard error of the mean (SEM) of  $N = 3$  biological replicates.  $N = 26$  (HeLa full media),  $N = 29$  (HeLa HBSS),  $N = 22$  (HeLa TFEB;3<sup>KO</sup> full media),  $N = 25$  (HeLa TFEB;3<sup>KO</sup> HBSS) cells were analyzed. Student's paired *t*-test \* $P < 0.05$ ; NS, not significant.
- G EATR assay in HeLa cells with indicated genotypes (ctrl = wild type) showing % of cells with acidified ER measured by FACS analysis. HBSS starvation was for 16 h. Mean  $\pm$  standard error of the mean (SEM) of  $N = 5$  biological replicates/treatment/genotype. One-way analysis of variance (ANOVA)  $P = 0.0002$ ; Sidak's multiple comparison test \*\* $P < 0.005$ ; NS, not significant.

Source data are available online for this figure.

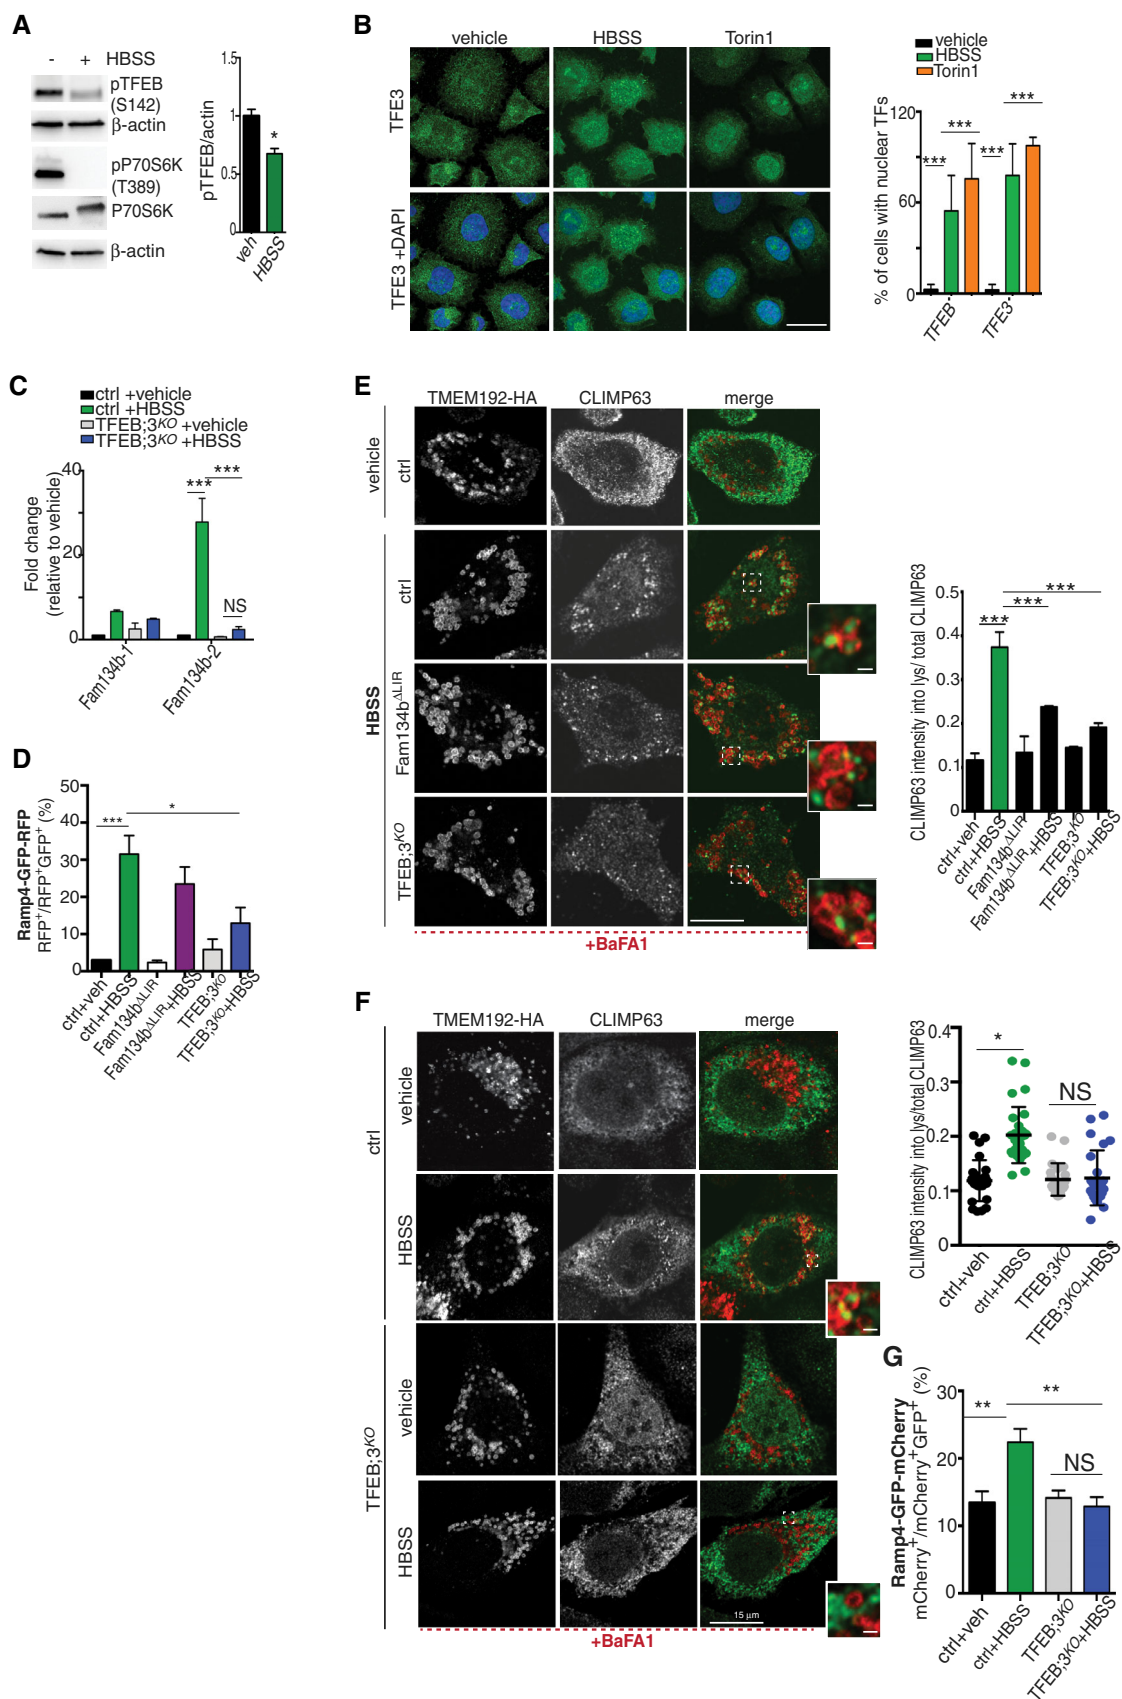

Figure EV4.

**Figure EV5. Fam134b-HA mRNA expression rescued *Fam134b<sup>mo</sup>* skeletal phenotype.**

- A qRT-PCR analysis of *Fam134b* gene in medaka fish with indicated genotypes. Values were normalized to *Hprt* gene and expressed as fold change relative to scramble fish. Mean  $\pm$  standard error of the mean (SEM) of  $N = 3$  biological replicates.
- B Reverse transcription-PCR analysis of *Fam134b* gene in *Fam134b<sup>wt</sup>* and *Fam134b<sup>mo</sup>* medaka fish. Actin gene was used as control gene. M = marker; B = blank.
- C Western blot analysis of HA-tag from a pool of medaka fish embryos injected with scramble or injected with mRNA produced from human HA-FAM134B pcdna3.1 (+).  $\beta$ -actin was used as a loading control.
- D Bar graphs show quantification of total length and head size of medaka fish model of *Fam134b<sup>mo</sup>* and mRNA-injected *Fam134b<sup>mo</sup>* expressed as % relative to the scramble. Mean  $\pm$  standard error of the mean (SEM) of at least  $n = 8$  fish per genotype. Student's unpaired t-test \* $P < 0.05$ ; NS, not significant.
- E, F Bar graphs show quantification of Alcian Blue (cartilage) (e) and Alizarin Red (bone) (f) staining of *Fam134b<sup>mo</sup>* and mRNA-injected *Fam134b<sup>mo</sup>*. Ethmoid plate (EP), palatoquadrate (PQ), ceratohyal (CH), paired prootics (PO), ceretobranchials 1–5 (CB1 to CB5) cartilage length (E), and bone mineralization (F) were evaluated. Values were expressed as % relative to the scramble (100% red dotted line). Mean  $\pm$  standard error of the mean (SEM) of at least  $n = 6$  fish/genotype. Student's unpaired t-test \* $P < 0.05$ ; \*\* $P < 0.005$ ; \*\*\* $P < 0.0005$  for comparison between *Fam134b<sup>mo</sup>* and mRNA-injected *Fam134b<sup>mo</sup>* medaka.

Source data are available online for this figure.

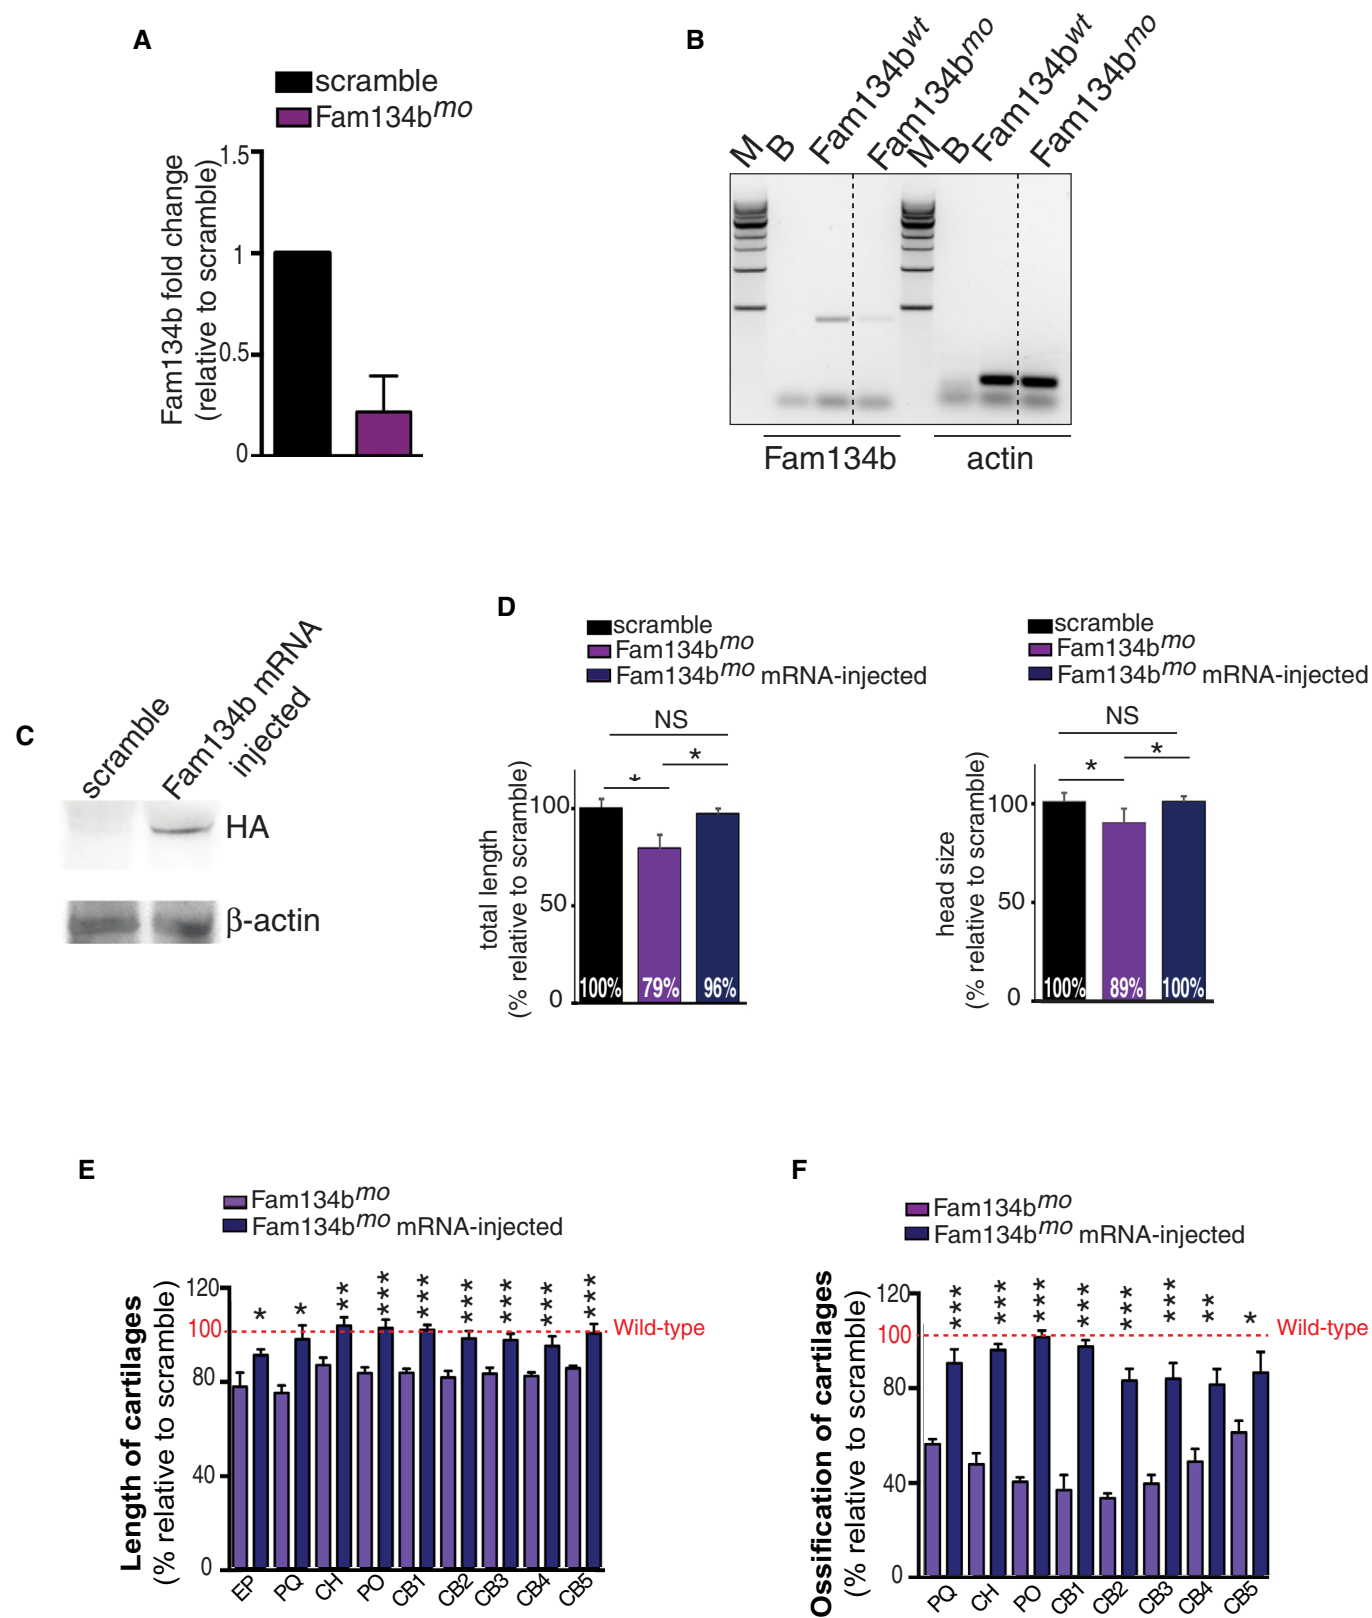

Figure EV5.
